# Supplementary material for: Hypoxia and Hypoxia-Inducible Factor-1 Expression Enhance Osteolytic Bone Metastases of Breast Cancer
Source: Oxford University Press journal article supplement (doi:10.1158/0008-5472.can-06-2355), 2007-05-01
Supplement: 00085472can062355-sup-suppl_figs_1-4.pdf [file 00085472can062355-sup-suppl_figs_1-4.pdf]

20% O<sub>2</sub>

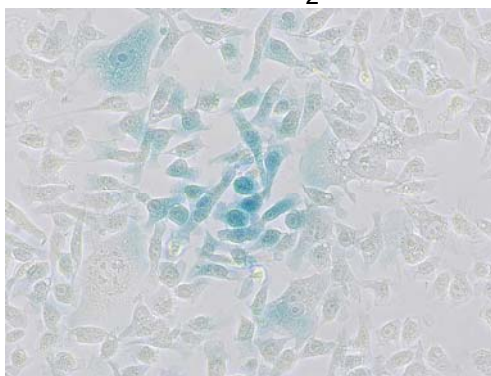

1% O<sub>2</sub>

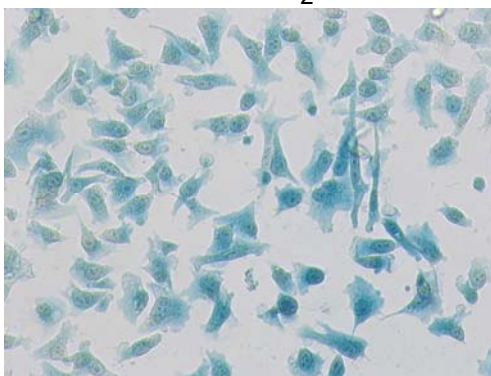

Supplementary Figure 1

A

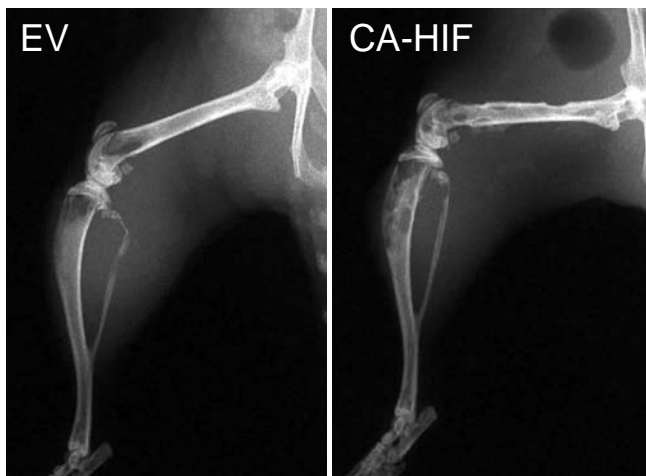

B

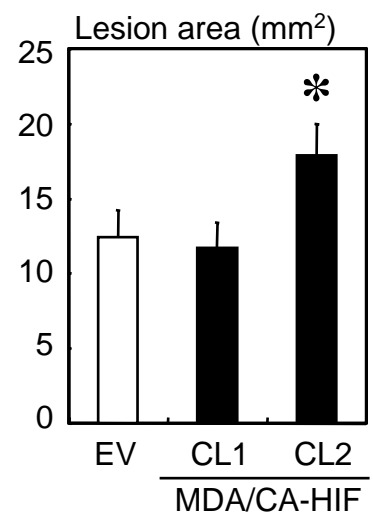

Supplementary Figure 2

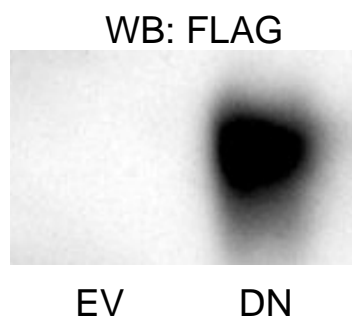

Supplementary Figure 3

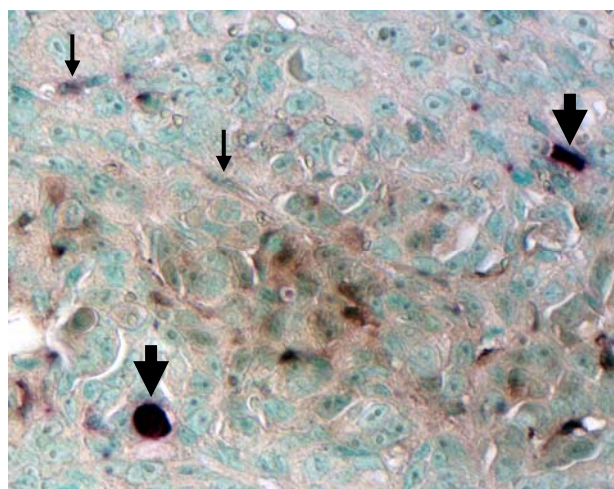

Supplementary Figure 4
