# Supplementary material for: Hypoxia and Hypoxia-Inducible Factor-1 Expression Enhance Osteolytic Bone Metastases of Breast Cancer
Source: Oxford University Press journal article supplement (doi:10.1158/0008-5472.can-06-2355), 2007-05-01
Supplement: 00085472can062355-sup-suppl_legends_1-4.pdf [file 00085472can062355-sup-suppl_legends_1-4.pdf]

## Supplementary Figure Legends

**FIGURE S1** X-Gal staining of MDA-MB-231 cells cultured with TAT-ODD- $\beta$ -Gal (1 unit of  $\beta$ -Gal activity/ml) for 24 h under 20% or 1% O<sub>2</sub>.

**FIGURE S2** Effects of CA-HIF-1 $\alpha$  on bone metastases of MDA-MB-231 cells.

(A) Representative radiographs of bone metastases of MDA/EV (EV) and MDA/CA-HIF (clone 2; CA-HIF) in nude mice at day 28.

(B) Radiographical analysis of osteolytic lesion area of MDA/CA-HIF. Data are shown as osteolytic lesion area (mm<sup>2</sup>)/mouse (n = 9/group). \* Significantly different from MDA/EV (p<0.05)

**FIGURE S3** Establishment of MDA-MB-231 cells overexpressing DN-HIF-1 $\alpha$  (DN). Expression of DN-HIF-1 $\alpha$  was determined by western blot using anti-FLAG antibody (EV: MDA/EV).

**FIGURE S4** Representative histological view of bone metastasis of MDA-MB-231 cells in nude mice stained with ALPase, TRAP, and immunohistochemistry for pimonidazole. ALPase-positive spindle-shaped osteoblast precursor cells (thin arrows) and TRAP-positive mononuclear osteoclast precursor cells (thick arrows) are adjacent to pimonidazole-positive hypoxic MDA-MB-231 cells (brown in color). (Original magnification x400)
